# Supplementary material for: Mg/W-codoped vanadium dioxide thin films with enhanced visible transmittance and low phase transition temperature
Source: Royal Society of Chemistry journal article supplement (doi:10.1039/c5tc01062d), 2015-01-01
Supplement: c5tc01062d1.pdf [file c5tc01062d1.pdf]

## Supporting information

### The Mg/W codoped Vanadium Dioxide Thin Films with Enhanced Visible Transmittance and Low Phase Transition Temperature

Ning Wang, Shiyu Liu, X.T. Zeng, Shlomo Magdassi and Yi Long

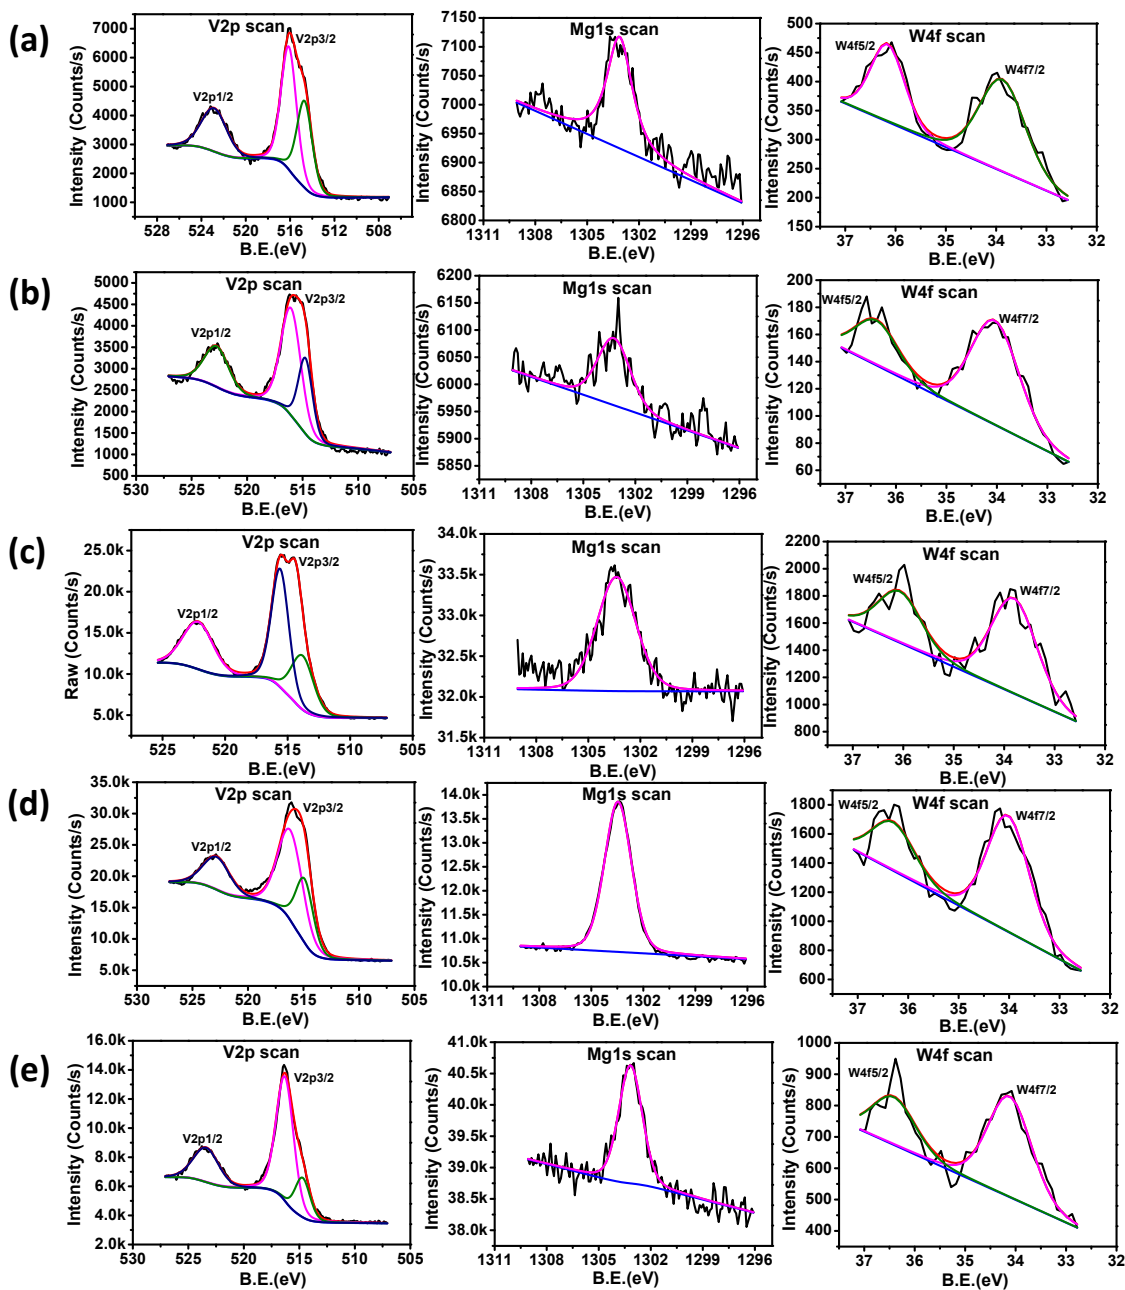

**Figure S1.** High resolution XPS scan of V<sub>2p</sub>, Mg<sub>1s</sub> and W<sub>4f</sub> for the Mg, W-codoped VO<sub>2</sub> samples, V<sub>0.98-x</sub>W<sub>0.02</sub>Mg<sub>x</sub>O<sub>2</sub> (a, x=0.01; b, x=0.02; c, x=0.03; d, x=0.04; e, x=0.05).
